# Supplementary material for: Sensitive photoelectric sensing for 5-HMF detection
Source: Royal Society of Chemistry journal article supplement (doi:10.1039/d3ay02273k), 2024-01-01
Supplement: d3ay02273k1.pdf [file d3ay02273k1.pdf]

## **Sensitive photoelectric sensing for 5-HMF detection**

Xin He<sup>a</sup>, Caiyun Jiang<sup>a,b\*</sup>, Jie Yang<sup>a</sup>, Shuangchao Sheng<sup>a</sup>, Yuping Wang<sup>a,c\*</sup>

<sup>a</sup> School of Chemistry and Material Science, Jiangsu Provincial Key Laboratory of Materials Cycling and Pollution Control, Nanjing Normal University, Nanjing 210023, China

<sup>b</sup> Jiangsu Engineering Research and Development Center of Food Safety, Department of Health, Jiangsu Vocational Institute of Commerce, Nanjing 211168, China

<sup>c</sup> Jiangsu Key laboratory of Chemical Pollution Control and Resources Reuse, Nanjing University of Science and Technology, Nanjing 210094, China

\* Corresponding author: [jiangcaiyun29@126.com](mailto:jiangcaiyun29@126.com); [wangyuping@njnu.edu.cn](mailto:wangyuping@njnu.edu.cn)

## **2.1 Characterization of materials**

The structure of the material was analyzed by X-ray diffraction (XRD) by Cu-K $\alpha$  rays ( $\lambda = 1.5406 \text{ \AA}$ ) with a scanning range of  $5^\circ - 90^\circ$  and a scanning speed of  $5^\circ/\text{min}$ . The surface morphology and microstructure of SiO<sub>2</sub>@TiO<sub>2</sub> and h-TiO<sub>2</sub> nanospheres were observed using high-resolution thermal field emission scanning electron microscopy (FESEM) and H-7650 transmission electron microscopy (TEM). The elemental composition and chemical valence states of materials were determined with X-ray photoelectron spectroscopy (XPS). Brunauer-Emmett-Teller (BET) surface area test gave N<sub>2</sub> adsorption-desorption isotherm and the corresponding pore size distribution.

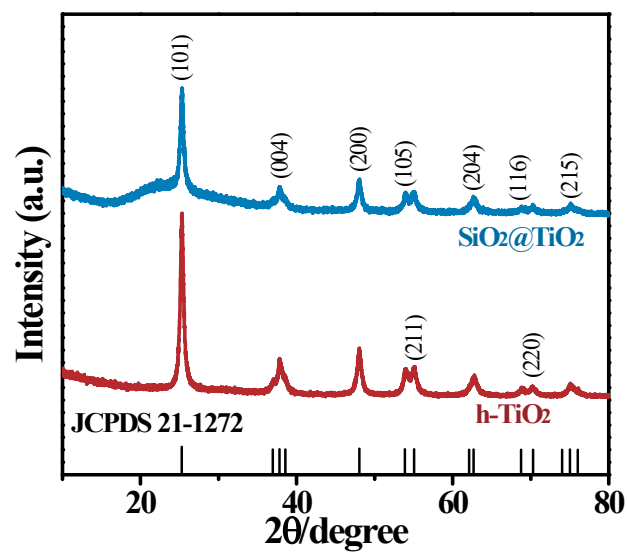

Fig. S1 XRD images of  $\text{SiO}_2@\text{TiO}_2$  and  $\text{h-TiO}_2$ .

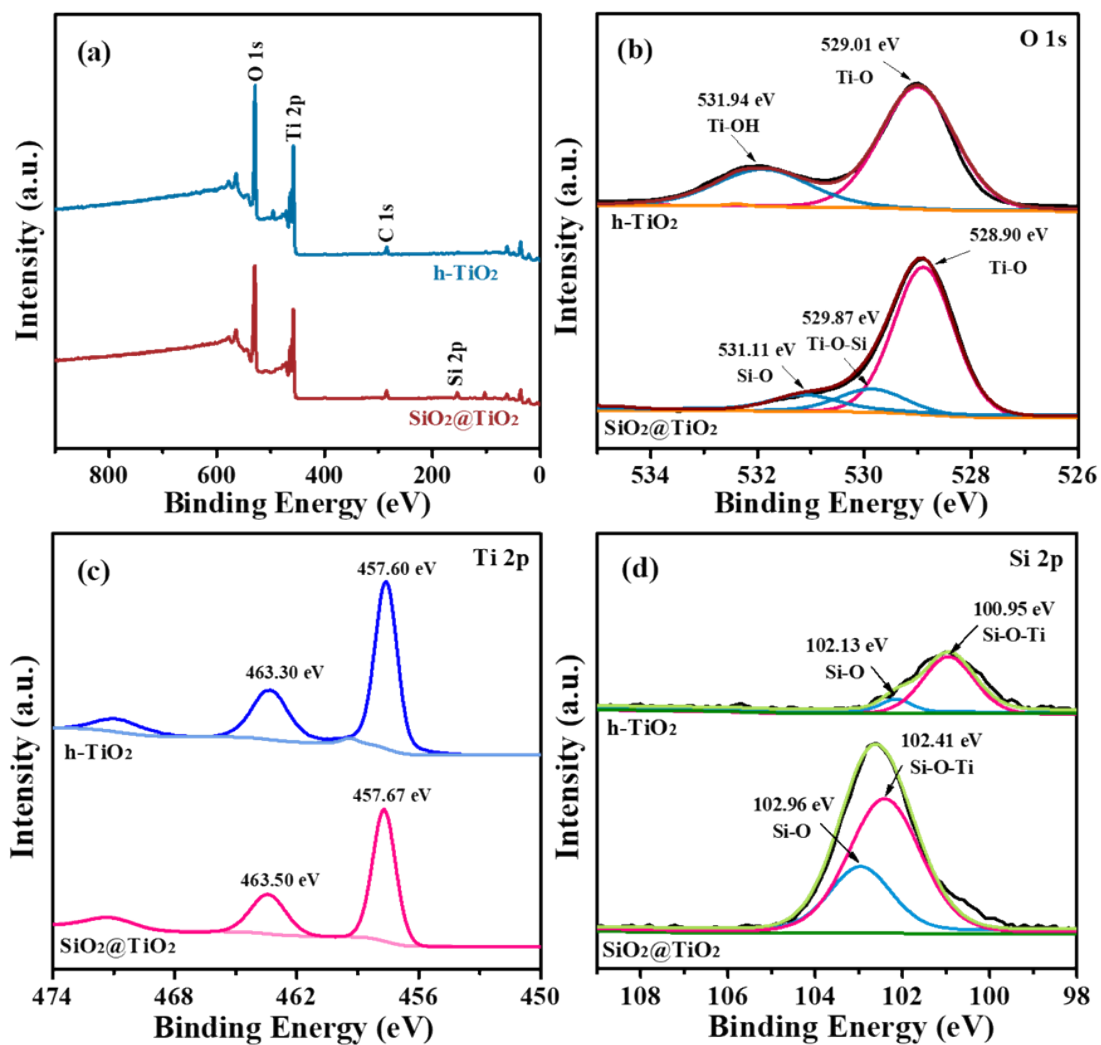

**Fig. S2** (a) Full XPS spectra of  $\text{SiO}_2@\text{TiO}_2$  and  $\text{h-TiO}_2$ ; (b) O 1s, (c) Ti 2p, (d) Si 2p corresponding XPS spectra.

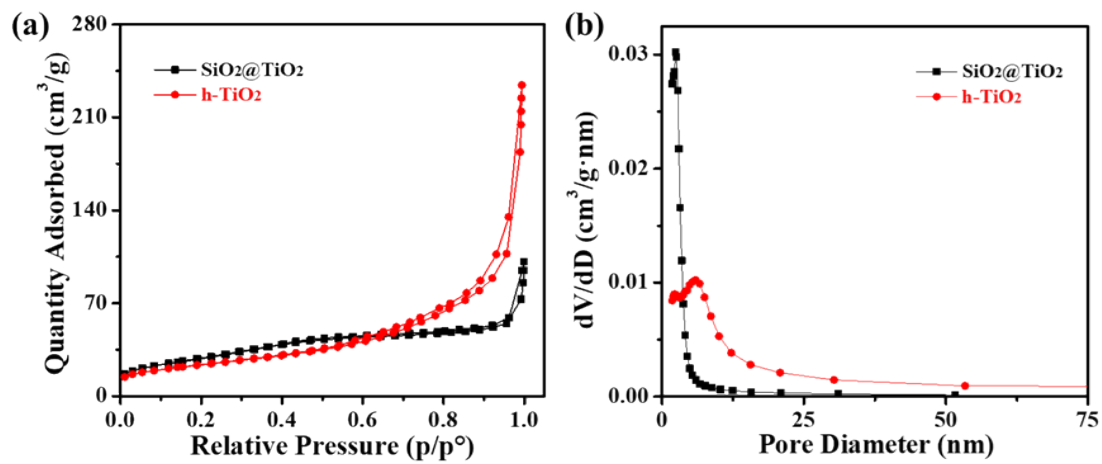

**Fig. S3** (a) N<sub>2</sub> adsorption-desorption isotherms of SiO<sub>2</sub>@TiO<sub>2</sub> and h-TiO<sub>2</sub>; (b) BJH aperture profile.

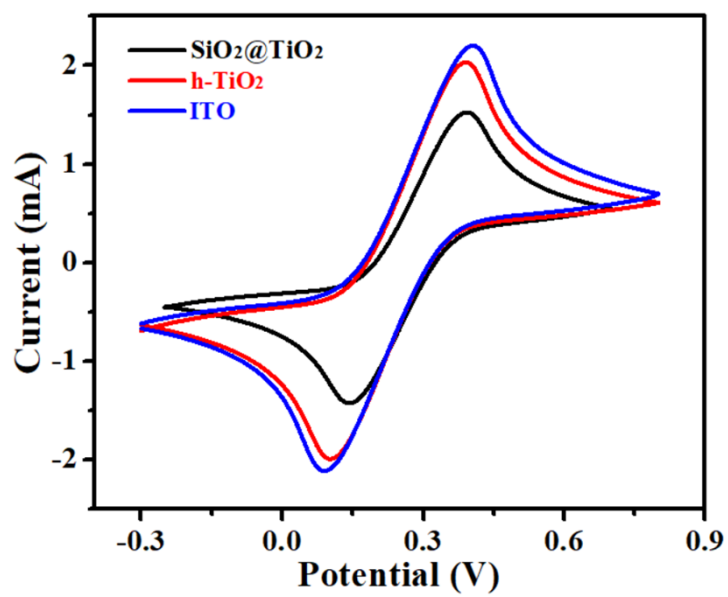

**Fig. S4** CV curves of SiO<sub>2</sub>@TiO<sub>2</sub>/ITO, h-TiO<sub>2</sub>/ITO and blank ITO in K<sub>3</sub>[Fe(CN)<sub>6</sub>] and K<sub>4</sub>[Fe(CN)<sub>6</sub>] mixtures.

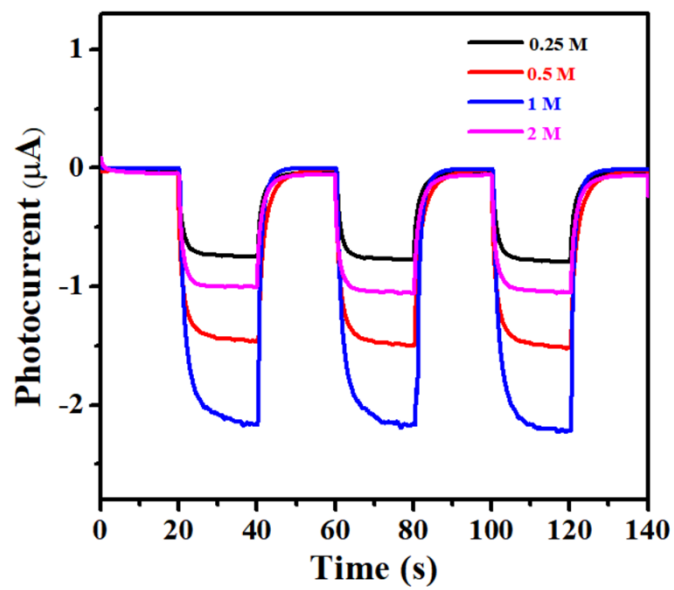

**Fig. S5** h-TiO<sub>2</sub> photocurrent response obtained by etching SiO<sub>2</sub> with different concentrations of NaOH solution.

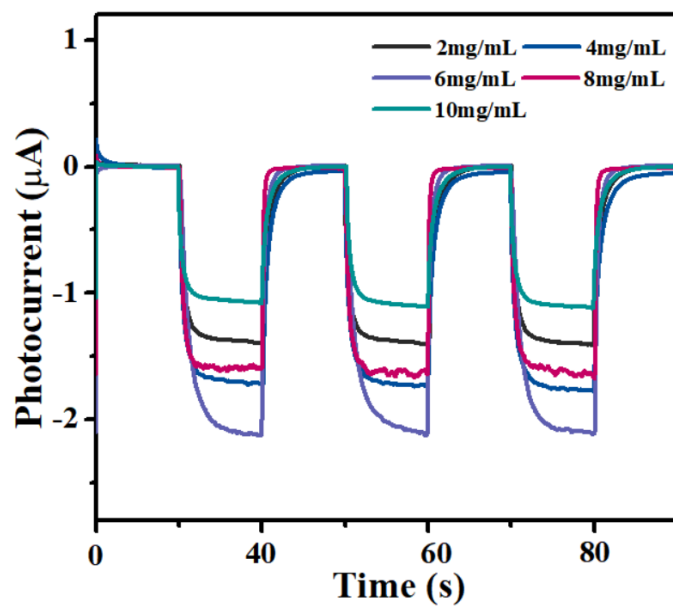

**Fig. S6** Effect of concentration of photoactive material on photocurrent response.



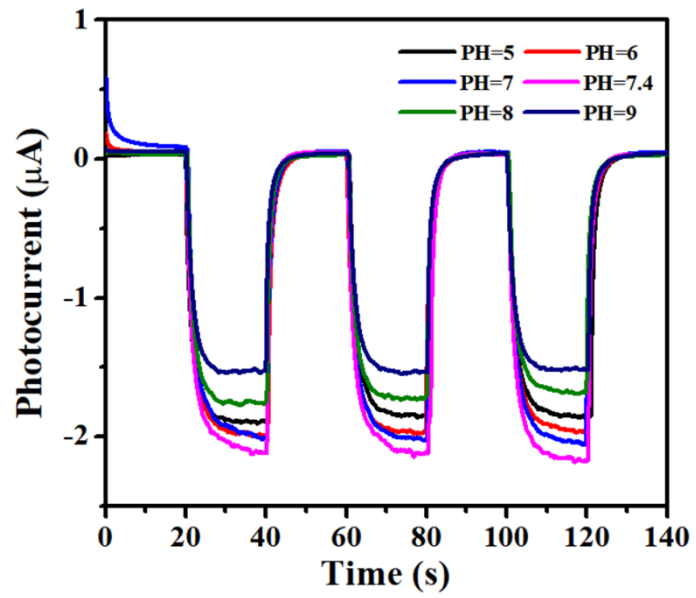

**Fig. S7** Effect of pH of electrolyte solution on photocurrent response of photoactive materials.

**Table S1** Comparison of 5-HMF detection by different methods.

| Analytical method      | Linear range/ $\mu\text{M}$ | LOD/nM  | References |
|------------------------|-----------------------------|---------|------------|
| PAD                    | 0.200-396.5                 | 237.89  | S1         |
| HPLC                   | 216-2160                    | 216002  | S2         |
| HPLC                   | 6.20-92.5                   | 18.5    | S3         |
| $^1\text{H}$ NMR       | 95.2-537.5                  | 95160   | S4         |
| ELISA                  | 0-158.6                     | 142.7   | 10         |
| MEKC                   | 7.90-198.2                  | 3409.7  | S5         |
| MEKC                   | 79.30-634.4                 | 713.7   | 11         |
| LC-MS                  | 7.90-79.3                   | 2616.9  | S6         |
| FAAS                   | 31.70-1903.1                | 10071.1 | S7         |
| h-TiO <sub>2</sub> PEC | 0.00001-0.100               | 0.001   | this work  |

## References

[S1] H. Xu, A. C. Templeton and R. A. Reed, Quantification of 5-HMF and dextrose in commercial aqueous dextrose solutions, *J. Pharm. Biomed. Anal.*, 2003, **32**, 451–459.

[S2] Y. H. Li and X. Y. Lu. Investigation on the origin of 5-HMF in Shengmai Yin decoction by RP-HPLC method, *J. Environ. Chem. Eng.*, 2005, **6**, 1015-21.

[S3] N. Spano, L. Casula, A. Panzanelli, M. Pilo, P. Piu, R. Scanu, A. Tapparo and G. Sanna, An RP-HPLC determination of 5-hydroxymethylfurfural in honey: The case of strawberry tree honey, *Talanta*, 2006, **68**, 1390–1395.

[S4] G. del Campo, I. Berregi, R. Caracena and J. Zuriarrain, Quantitative determination of caffeine, formic acid, trigonelline and 5-(hydroxymethyl) furfural in soluble coffees by <sup>1</sup>H NMR spectrometry, *Talanta*, 2010, **81**, 367–371.

[S5] Y. Foo Wong, A. Makahleh, K.M. Al Azzam, N. Yahaya, B. Saad and S. Amrah Sulaiman, Micellar electrokinetic chromatography method for the simultaneous determination of furanic compounds in honey and vegetable oils,

[S6] D. Tomasini, M.R.F. Sampaio, S. S. Caldas, J. G. Buffon, F. A. Duarte and E. G. Primel, Simultaneous determination of pesticides and 5-hydroxymethylfurfural in honey by the modified QuEChERS method and liquid chromatography coupled to tandem mass spectrometry, *Talanta*, 2012, **99**, 380–386.

[S7] R. Gürkan, A New Enrichment Method for Quantification of 5-Hydroxymethylfurfural by Indirect Flame Atomic Absorption Spectrometry in Honey and Jam Samples, *JAOAC Int.*, 2021, **104**, 682–692.
